# Supplementary material for: Human faecal collection methods demonstrate a bias in microbiome composition by cell wall structure
Source: PubMed Central journal article supplement (PMC6856092; doi:10.1038/s41598-019-53183-5), 2019-11-14
Supplement: 41598_2019_53183_MOESM1_ESM.pdf [file 41598_2019_53183_MOESM1_ESM.pdf]

1 **Title:** Human faecal collection methods demonstrate a bias in microbiome composition by  
2 cell wall structure.

3

4 **Authors:**

5 Emma-Jane Watson<sup>1</sup>, Jennifer Giles<sup>1</sup>, Benjamin L. Scherer<sup>1</sup> and Dr Paul Blatchford<sup>2,\*</sup>.

6

7 <sup>1</sup> CSIRO Health and Biosecurity, Gate 13 Kintore Avenue, Adelaide, South Australia 5000,  
8 Australia

9 <sup>2</sup> Zespri International Limited, 400 Maunganui Road, Mt Maunganui 3149, New Zealand.

10 \* paul.blatchford@zespri.com

11

|                              | Mean Bacterial Abundance<br>(%) ±SEM |                    | Gram<br>Status | Percent<br>Difference | P-<br>Value |
|------------------------------|--------------------------------------|--------------------|----------------|-----------------------|-------------|
|                              | Fresh<br>frozen                      | Collection<br>tube |                |                       |             |
| <i>Bacteroides</i>           | 4.66 ± 0.65                          | 17.48 ± 1.25       | Negative       | -12.82                | <0.001*     |
| <i>Prevotella</i>            | 1.37 ± 0.61                          | 7.66 ± 1.81        | Negative       | -6.29                 | 0.192       |
| <i>Alistipes</i>             | 0.69 ± 0.08                          | 2.61 ± 0.26        | Negative       | -1.92                 | <0.001*     |
| <i>Phascolarctobacterium</i> | 0.28 ± 0.06                          | 1.53 ± 0.3         | Negative       | -1.25                 | 0.520       |
| <i>Barnesiella</i>           | 0.31 ± 0.07                          | 1.27 ± 0.21        | Negative       | -0.96                 | <0.010*     |
| <i>Oscillibacter</i>         | 0.43 ± 0.06                          | 1.22 ± 0.11        | Negative       | -0.79                 | <0.001*     |
| <i>Parabacteroides</i>       | 0.19 ± 0.03                          | 0.96 ± 0.11        | Negative       | -0.77                 | <0.001*     |
| <i>Sutterella</i>            | 0.04 ± 0.02                          | 0.5 ± 0.11         | Negative       | -0.46                 | 0.048*      |
| <i>Odoribacter</i>           | 0.06 ± 0.01                          | 0.45 ± 0.03        | Negative       | -0.39                 | <0.001*     |
| <i>Faecalibacterium</i> †    | 6.02 ± 0.46                          | 6.34 ± 0.32        | Positive       | -0.32                 | 1.000       |
| <i>Parasutterella</i>        | 0.04 ± 0.01                          | 0.34 ± 0.06        | Negative       | -0.3                  | <0.001*     |
| <i>Paraprevotella</i>        | 0.04 ± 0.02                          | 0.29 ± 0.11        | Negative       | -0.25                 | 1.000       |
| <i>Coprobacter</i>           | 0.02 ± 0                             | 0.25 ± 0.05        | Negative       | -0.23                 | <0.001*     |
| <i>Cerasicoccus</i>          | 0.01 ± 1                             | 0.19 ± 0.06        | Negative       | -0.18                 | 0.280       |
| <i>Butyrivibrio</i>          | 0.28 ± 0.16                          | 0.43 ± 0.24        | Negative       | -0.15                 | 0.420       |
| <i>Haemophilus</i>           | 0.05 ± 0.02                          | 0.17 ± 0.05        | Negative       | -0.12                 | 0.006*      |

|                               |              |             |          |       |         |
|-------------------------------|--------------|-------------|----------|-------|---------|
| <i>Acidaminococcus</i>        | 0.05 ± 0.03  | 0.15 ± 0.06 | Negative | -0.1  | 0.280   |
| <i>Desulfovibrio</i>          | 0.03 ± 0.01  | 0.12 ± 0.04 | Negative | -0.09 | 0.680   |
| <i>Megasphaera</i>            | 0 ± 0        | 0.09 ± 0.06 | Negative | -0.09 | 0.400   |
| <i>Victivallis</i>            | 0 ± 0        | 0.09 ± 0.03 | Negative | -0.09 | <0.001* |
| <i>Clostridium IV</i>         | 0.67 ± 0.17  | 0.76 ± 0.13 | Variable | -0.09 | 0.680   |
| <i>Clostridium XIVb†</i>      | 0.21 ± 0.03  | 0.29 ± 0.04 | Positive | -0.08 | 0.052   |
| <i>Methanomassiliicoccus†</i> | 0 ± 0        | 0.06 ± 0.04 | Positive | -0.06 | 0.520   |
| <i>Cloacibacillus</i>         | 0 ± 0        | 0.04 ± 0.03 | Negative | -0.04 | 0.660   |
| <i>Megamonas</i>              | 0.06 ± 0.05  | 0.09 ± 0.06 | Negative | -0.03 | 0.110   |
| <i>Succiniclasicum</i>        | 0.07 ± 0.05  | 0.1 ± 0.07  | Negative | -0.03 | 1.000   |
| <i>Akkermansia†</i>           | 0.9 ± 0.19   | 0.87 ± 0.17 | Negative | 0.03  | 1.000   |
| <i>Enterococcus</i>           | 0.05 ± 0.03  | 0.02 ± 0.01 | Positive | 0.03  | 1.000   |
| <i>Lactobacillus</i>          | 0.23 ± 0.11  | 0.16 ± 0.09 | Positive | 0.07  | 0.003*  |
| <i>Faecalitalea</i>           | 0.19 ± 0.09  | 0.11 ± 0.06 | Positive | 0.08  | 0.660   |
| <i>Methanosphaera</i>         | 0.13 ± 0.09  | 0.05 ± 0.03 | Positive | 0.08  | 0.600   |
| <i>Slackia</i>                | 0.24 ± 0.06  | 0.14 ± 0.04 | Positive | 0.1   | 0.400   |
| <i>Dialister†</i>             | 0.8 ± 0.16   | 0.66 ± 0.13 | Negative | 0.14  | 0.880   |
| <i>Intestinibacter</i>        | 0.5 ± 0.1    | 0.33 ± 0.08 | Positive | 0.17  | 0.380   |
| <i>Senegalimassilia</i>       | 0.42 ± 0.09  | 0.18 ± 0.05 | Positive | 0.24  | 0.600   |
| <i>Holdemanella</i>           | 0.71 ± 0.19  | 0.42 ± 0.16 | Positive | 0.29  | 1.000   |
| <i>Butyricicoccus</i>         | 0.89 ± 0.14  | 0.54 ± 0.06 | Positive | 0.35  | 0.360   |
| <i>Terrisporobacter</i>       | 0.68 ± 0.18  | 0.3 ± 0.1   | Positive | 0.38  | 0.360   |
| <i>Streptococcus</i>          | 0.78 ± 0.13  | 0.34 ± 0.07 | Positive | 0.44  | 0.002*  |
| <i>Teuricibacter</i>          | 0.64 ± 0.22  | 0.2 ± 0.08  | Positive | 0.44  | 0.150   |
| <i>Coprococcus</i>            | 3.07 ± 0.24  | 2.61 ± 0.22 | Positive | 0.46  | 0.240   |
| <i>Gemmiger†</i>              | 2.16 ± 0.22  | 1.54 ± 0.18 | Negative | 0.62  | 0.086   |
| <i>Ruminococcus_L</i>         | 2.18 ± 0.24  | 2.05 ± 0.22 | Positive | 0.76  | 0.30*   |
| <i>Lachnospiracea_is</i>      | 4.45 ± 0.26  | 3.43 ± 0.2  | Positive | 1.02  | 0.019*  |
| <i>Roseburia</i>              | 6.32 ± 0.72  | 5.25 ± 0.51 | Positive | 1.07  | 1.000   |
| <i>Fusicatenibacter</i>       | 3.59 ± 0.4   | 2.47 ± 0.28 | Positive | 1.12  | 0.118   |
| <i>Anaerostipes</i>           | 3.4 ± 0.35   | 2.16 ± 0.23 | Positive | 1.24  | 0.009*  |
| <i>Methanobrevibacter</i>     | 1.91 ± 0.52  | 0.58 ± 0.14 | Positive | 1.33  | 1.000   |
| <i>Clostridium_ss</i>         | 2.36 ± 0.51  | 0.98 ± 0.2  | Positive | 1.38  | 0.066   |
| <i>Dorea</i>                  | 3.18 ± 0.27  | 1.8 ± 0.15  | Positive | 1.38  | <0.001* |
| <i>Romboutsia</i>             | 2.49 ± 0.48  | 1.07 ± 0.21 | Positive | 1.42  | 0.005*  |
| <i>Bifidobacterium</i>        | 3.72 ± 0.69  | 2.06 ± 0.42 | Positive | 1.66  | 0.076   |
| <i>Ruminococcus_R</i>         | 6.3 ± 0.5    | 3.36 ± 0.38 | Positive | 2.94  | <0.001* |
| <i>Collinsella</i>            | 5.98 ± 0.82  | 2.95 ± 0.48 | Positive | 3.03  | 0.010*  |
| <i>Blautia</i>                | 16.05 ± 0.98 | 6.85 ± 0.45 | Positive | 9.2   | <0.001* |

12

13 **Supplementary Table 1: Microbial relative abundance (%) at genus-level.**

14 *Fifty-five bacterial genera in fresh frozen samples compared to DNA collection tube samples*

15 *with associated **Gram** stain classification. There are six exceptions to the cellular wall*

- 16 *structure trend, denoted by  $\tau$ . Significant differences between methods were determined with the*
- 17 *Wilcoxon Signed Rank test after False Discovery Rate (FDR) correction ( $P^* < 0.050$ ).*
- 18 *Ruminococcus R – Ruminococcus within the Ruminococcaceae family; Ruminococcus L –*
- 19 *Ruminococcus within the Lachnospiraceae family; Lachnospiraceae IS – Lachnospiraceae incertae*
- 20 *sedis.*
